# Supplementary material for: Design, preparation, and optimized luminescence of a dodec-fluoride phosphor Li3Na3Al2F12:Mn4+for warm WLED applications
Source: Royal Society of Chemistry journal article supplement (doi:10.1039/c7tc03805d), 2017-01-01
Supplement: c7tc03805d1.pdf [file c7tc03805d1.pdf]

## Electronic Supplementary Information

### Design, preparation, and optimized luminescence of a dodec-fluoride phosphor $\text{Li}_3\text{Na}_3\text{Al}_2\text{F}_{12}:\text{Mn}^{4+}$ for warm WLEDs application

Mengmeng Zhu,<sup>a</sup> Yuexiao Pan,<sup>a\*</sup> Luqing Xi,<sup>a</sup> Hongzhou Lian,<sup>b</sup> Jun Lin<sup>b\*</sup>

<sup>a</sup>Key Laboratory of Carbon Materials of Zhejiang Province, College of Chemistry and Materials Engineering, Wenzhou University, Wenzhou 325035, P.R. China.

E-mail: yxpan8@gmail.com; Fax&Tel: +86-577-88373017

<sup>b</sup>State Key Laboratory of Rare Earth Resource Utilization, Changchun Institute of Applied Chemistry, Chinese Academy of Sciences, Changchun 130022, P. R. China

\*E-mail: jlin@ciac.ac.cn; Fax: +86-431-85698041; Tel: +86-431-85262031

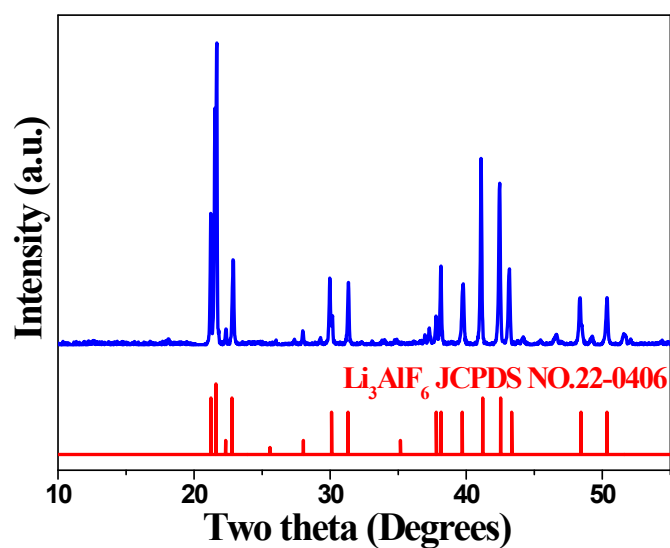

**Figure S1.** X-ray diffraction pattern of the sample obtained in the reaction with molecular ratio of  $\text{LiF}/\text{AlF}_3$  at 3:1 absent of  $\text{NaF}$  as compared with the standard data of  $\text{Li}_3\text{AlF}_6$  in JCPDS no. 22-0406.

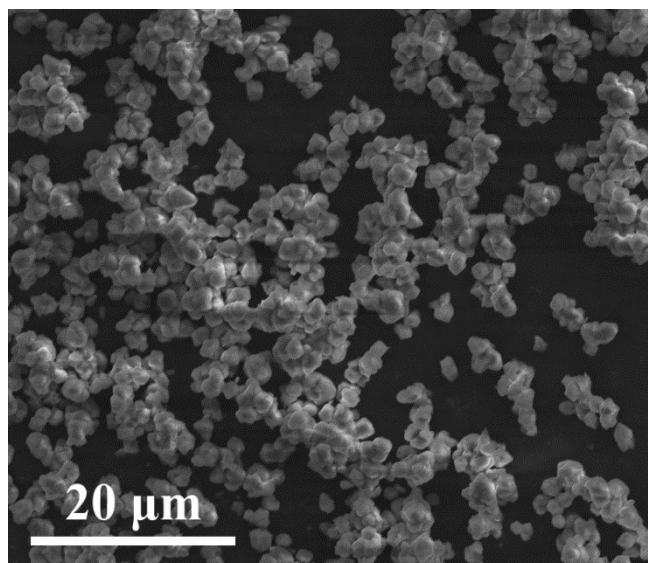

**Figure S2.** SEM images of  $\text{LiNa}_2\text{AlF}_6:\text{Mn}^{4+}$  phosphor obtained at room temperature.

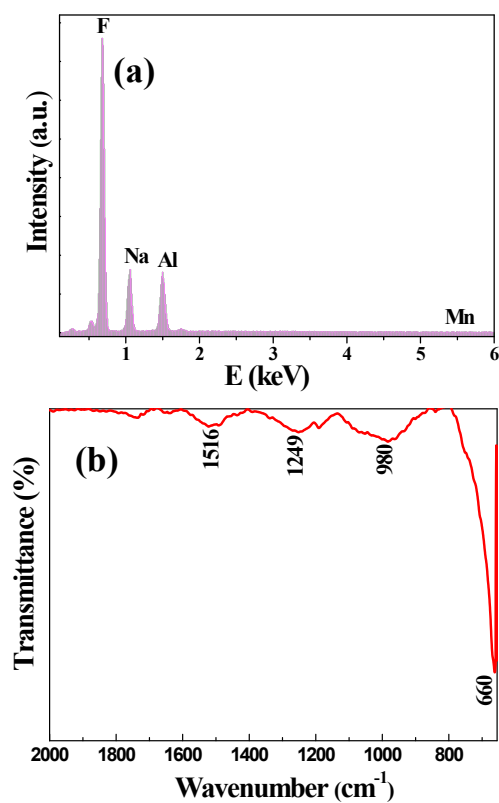

**Figure S3.** (a) EDS and (d) IR spectrum of red phosphor  $\text{Li}_3\text{Na}_3\text{Al}_2\text{F}_{12}:\text{Mn}^{4+}$ .

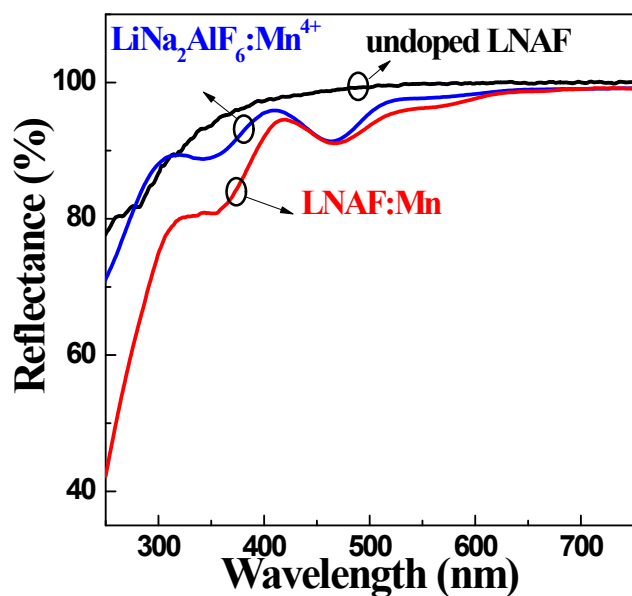

**Figure S4.** The powder diffuse reflectance spectra of undoped  $\text{Li}_3\text{Na}_3\text{Al}_2\text{F}_{12}$  and two red phosphors  $\text{Li}_3\text{Na}_3\text{Al}_2\text{F}_{12}:\text{Mn}^{4+}$  and  $\text{LiNa}_2\text{AlF}_6:\text{Mn}^{4+}$ .

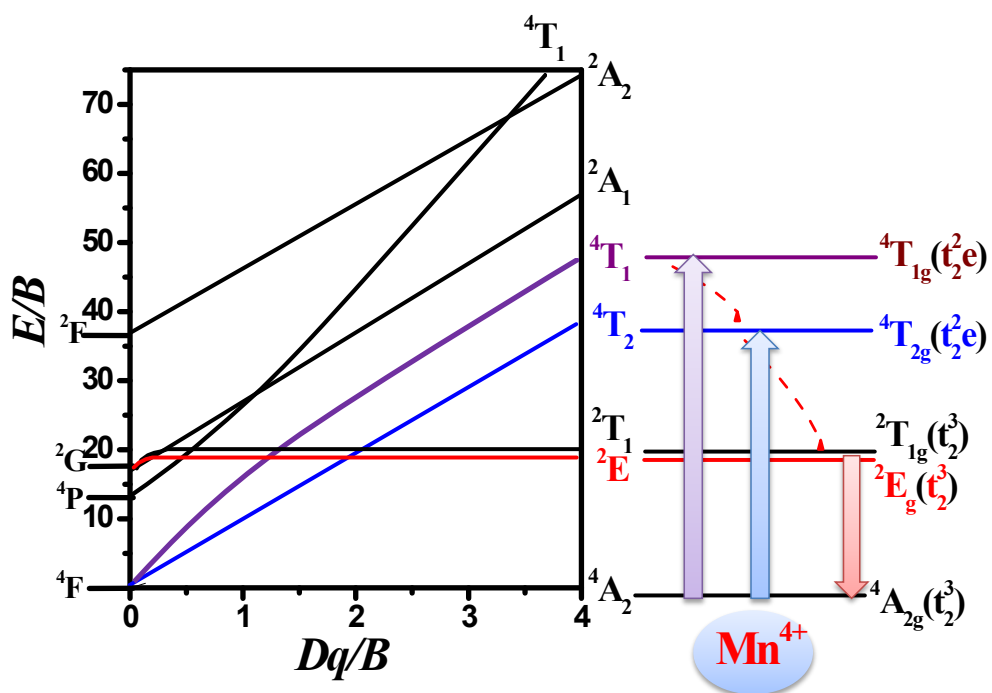

**Figure S5.** Tanabe-Sugano energy level diagram for  $5d^3$  electron configuration of  $\text{Mn}^{4+}$  in the center of octahedron.

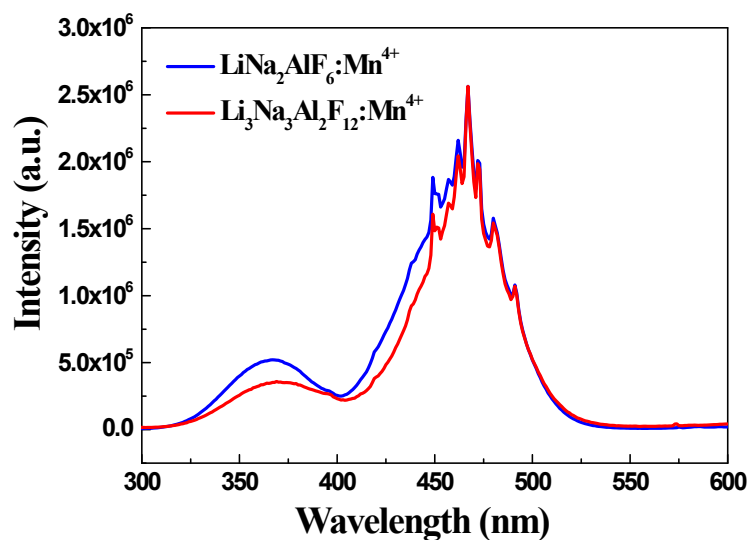

**Figure S6.** The excitation spectra of LNAF:Mn and  $\text{LiNa}_2\text{AlF}_6:\text{Mn}^{4+}$  with modified intensity.

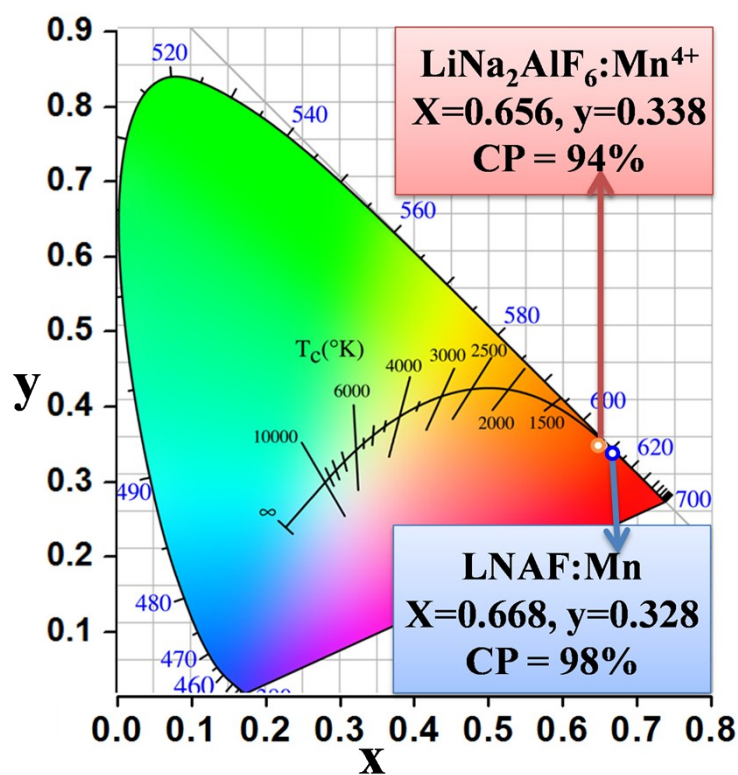

**Figure S7.** CIE chromaticity coordinates and color purity of the as-obtained red phosphors  $\text{Li}_3\text{Na}_3\text{Al}_2\text{F}_{12}:\text{Mn}^{4+}$  and  $\text{LiNa}_2\text{AlF}_6:\text{Mn}^{4+}$ .

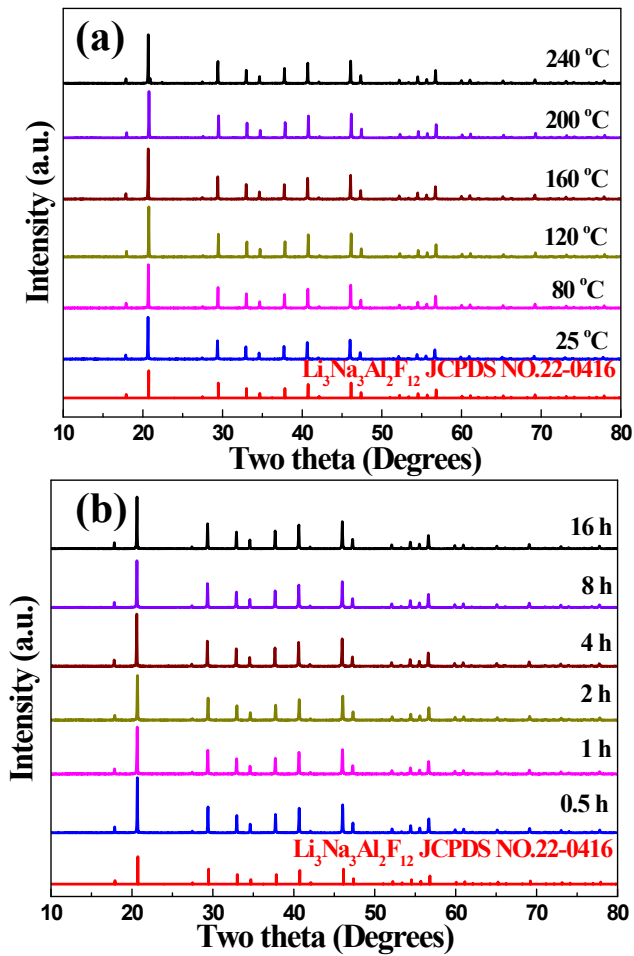

**Figure S8.** X-ray diffraction patterns of the red phosphor  $\text{Li}_3\text{Na}_3\text{Al}_2\text{F}_{12}:\text{Mn}^{4+}$  obtained (a) at various temperatures and (b) for different reaction times compared with the standard data of  $\text{Li}_3\text{Na}_3\text{Al}_2\text{F}_{12}$  in JCPDS no. 22-0416.

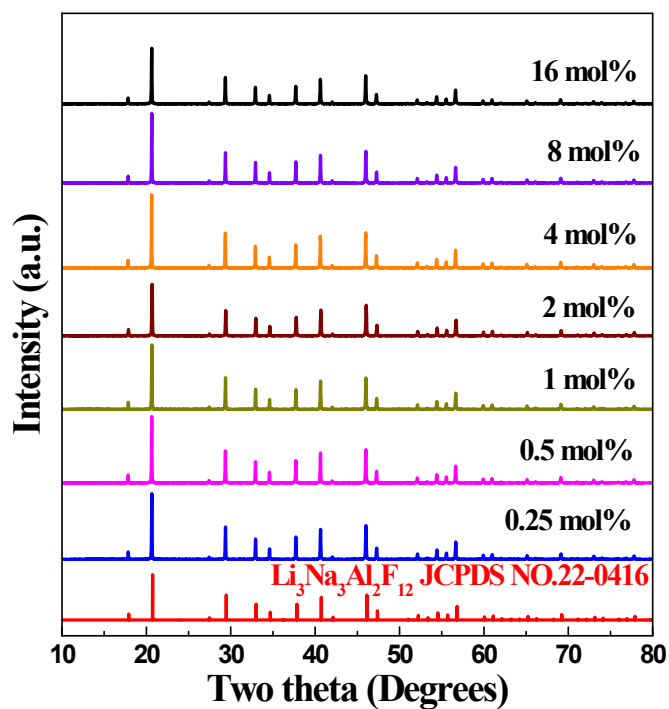

**Figure S9.** Dependence of x-ray diffraction patterns of the red phosphor  $\text{Li}_3\text{Na}_3\text{Al}_2\text{F}_{12}:\text{Mn}^{4+}$  on ratio of  $\text{K}_2\text{MnF}_6/\text{Li}_3\text{Na}_3\text{Al}_2\text{F}_{12}$ .

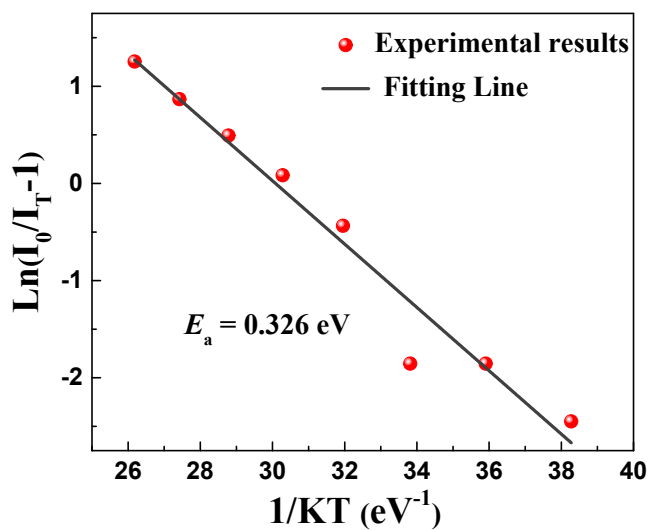

**Figure S10.** Arrhenius fitting of the emission intensity of the phosphor  $\text{Li}_3\text{Na}_3\text{Al}_2\text{F}_{12}:\text{Mn}^{4+}$  decreased with temperature increasing.

**Table S1.** Details of Rietveld Refinement of  $\text{Li}_3\text{Na}_3\text{Al}_2\text{F}_{12}:\text{Mn}^{4+}$  and  $\text{LiNa}_2\text{AlF}_6:\text{Mn}^{4+}$ .

| <b>Formula</b>      | <b><math>\text{Li}_3\text{Na}_3\text{Al}_2\text{F}_{12}</math></b> | <b><math>\text{LiNa}_2\text{AlF}_6</math></b> |
|---------------------|--------------------------------------------------------------------|-----------------------------------------------|
| CSD number          | 9923                                                               | 96477                                         |
| Formula weight      | 371.73                                                             | 193.89                                        |
| Crystal system      | Cubic                                                              | monoclinic                                    |
| Space group         | Ia-3d                                                              | P121/n1                                       |
| D (calc)            | 2.77                                                               | 3.02                                          |
| a (Å)               | 12.122(2)                                                          | 5.2842(1)                                     |
| b (Å)               | 12.122(2)                                                          | 5.3698(1)                                     |
| c (Å)               | 12.122(2)                                                          | 7.5063(2)                                     |
| V (Å <sup>3</sup> ) | 1781.24                                                            | 212.99                                        |
| Z                   | 8                                                                  | 2                                             |
| Space group number  | 230                                                                | 14                                            |
| a                   | 90°                                                                | 90°                                           |
| β                   | 90°                                                                | 89.98(1)°                                     |
| γ                   | 90°                                                                | 90°                                           |
